# Supplementary material
Source: publisher site journal article supplement (https://www.spandidos-publications.com/580/downloadSupplementary)
Supplement: Supplementary file 1 [file downloadSupplementary]

## Sheet: Sheet1
Majority protein IDs	Protein names	Gene names	Unique peptides OE-01	Unique peptides OE-02	Unique peptides OE-03	Unique peptides ONC-01	Unique peptides ONC-02	Unique peptides ONC-03	iBAQ OE-01	iBAQ OE-02	iBAQ OE-03	iBAQ ONC-01	iBAQ ONC-02	iBAQ ONC-03	OE-average value	ONC-average value	Fold change	P-value	Change
P63104	14-3-3 protein zeta/delta	YWHAZ	7	11	10	7	9	7	18523000	17865000	16720000	11549000	11751000	8835600	1.77027e+07	1.07119e+07	1.65262	0.00290981	up
P17980	26S protease regulatory subunit 6A	PSMC3	0	2	1	2	3	3	0	109760	86861	137300	199100	183550	98310.5	173317	0.567231	0.0478925	down
O00232	26S proteasome non-ATPase regulatory subunit 12	PSMD12	2	2	1	0	1	0	189890	128640	88698	0	52124	0	135743	52124	2.60423	0.0257293	up
Q96DV4	39S ribosomal protein L38, mitochondrial	MRPL38	1	2	1	1	1	1	81779	109180	79098	68078	55026	55056	90019	59386.7	1.51581	0.043943	up
Q9BYD3	39S ribosomal protein L4, mitochondrial	MRPL4	2	2	2	1	1	1	280050	269390	242850	93822	72807	83544	264097	83391	3.16697	0.000137977	up
P62280	40S ribosomal protein S11	RPS11	4	5	6	3	3	4	10100000	6530400	7977500	2673000	3246000	3929900	8.20263e+06	3.28297e+06	2.49854	0.0109991	up
P25398	40S ribosomal protein S12	RPS12	6	8	7	5	4	6	10236000	8760500	10302000	2776900	2770300	3289800	9.76617e+06	2.94567e+06	3.31544	0.000213055	up
P62263	40S ribosomal protein S14	RPS14	4	3	3	3	4	3	5539500	6139300	3971100	2821100	3092900	2708800	5.21663e+06	2.87427e+06	1.81494	0.0234034	up
P62841	40S ribosomal protein S15	RPS15	2	2	2	3	3	3	1843300	1510900	2109600	3173200	3424500	3777900	1.82127e+06	3.45853e+06	0.526601	0.00266613	down
P39019	40S ribosomal protein S19	RPS19	13	14	11	11	12	11	23410000	21382000	18364000	11947000	11989000	13285000	21052000	12407000	1.69678	0.00483676	up
P60866	40S ribosomal protein S20	RPS20	5	4	5	3	4	3	12224000	9265700	10333000	4970700	5830000	5338300	1.06076e+07	5.37967e+06	1.97179	0.00437151	up
P62266	40S ribosomal protein S23	RPS23	5	6	6	3	3	4	11077000	10937000	9576300	2986200	4040100	2557900	10530100	3.19473e+06	3.29608	0.000352168	up
P23396	40S ribosomal protein S3	RPS3	15	12	14	11	8	10	7622900	6348400	6612900	4624500	3691100	4881000	6861400	4.39887e+06	1.55981	0.00972528	up
P62081	40S ribosomal protein S7	RPS7	4	5	4	2	2	0	1681000	1939600	1173300	336900	644940	0	1.59797e+06	490920	3.25504	0.0121606	up
P62241	40S ribosomal protein S8	RPS8	15	14	14	10	10	13	62465000	52382000	48987000	21493000	22596000	21325000	5.46113e+07	2.18047e+07	2.50457	0.00128266	up
P46781	40S ribosomal protein S9	RPS9	9	8	10	7	7	9	12381000	8537000	9635800	3869500	5242600	6400000	10184600	5170700	1.96968	0.0209319	up
P08865	40S ribosomal protein SA	RPSA	10	10	8	9	6	8	10904000	8177800	6442500	3995100	3429900	3367500	8508100	3597500	2.365	0.0201574	up
P21589	5-nucleotidase	NT5E	4	3	4	2	2	3	643650	530830	669440	298440	275720	434440	614640	336200	1.8282	0.0130283	up
P10809	60 kDa heat shock protein, mitochondrial	HSPD1	19	15	14	14	12	13	5675200	4440100	3562500	2588200	2440800	2625900	4.55927e+06	2.55163e+06	1.7868	0.0310104	up
P05388	60S acidic ribosomal protein P0;60S acidic ribosomal protein P0-like	RPLP0;RPLP0P6	7	7	6	5	3	4	15068000	13311000	9128600	4800500	4186400	4343400	1.25025e+07	4.44343e+06	2.81371	0.0104163	up
P05386	60S acidic ribosomal protein P1	RPLP1	1	2	2	2	2	2	16485000	28343000	29648000	12764000	10417000	10887000	2.48253e+07	11356000	2.1861	0.0338357	up
P05387	60S acidic ribosomal protein P2	RPLP2	7	8	7	5	5	5	54587000	38446000	35652000	18565000	17133000	14444000	42895000	16714000	2.56641	0.0121924	up
P27635	60S ribosomal protein L10	RPL10	10	6	7	7	6	3	11035000	6014100	7199600	3882600	3279400	2704700	8082900	3288900	2.45763	0.0366762	up
P62906	60S ribosomal protein L10a	RPL10A	10	9	9	8	8	8	20238000	20428000	14853000	8714500	7820700	7187800	1.85063e+07	7.90767e+06	2.3403	0.0048762	up
P30050	60S ribosomal protein L12	RPL12	8	9	8	3	5	4	21523000	18226000	16061000	4133000	6292300	6541600	1.86033e+07	5.65563e+06	3.28935	0.00182848	up
P26373	60S ribosomal protein L13	RPL13	11	10	10	7	7	7	19445000	17846000	18412000	7461200	9145600	8436900	1.85677e+07	8347900	2.22423	0.000111857	up
P50914	60S ribosomal protein L14	RPL14	8	7	6	6	6	5	32913000	30963000	25147000	13659000	15786000	13744000	2.96743e+07	1.43963e+07	2.06124	0.00328889	up
P61313	60S ribosomal protein L15	RPL15	8	8	9	7	8	7	29409000	23747000	21783000	12757000	12173000	10594000	2.49797e+07	1.18413e+07	2.10953	0.00522285	up
P18621	60S ribosomal protein L17	RPL17	7	7	7	4	6	4	14412000	12108000	11620000	5293100	4244200	5759800	1.27133e+07	5.09903e+06	2.49328	0.00142606	up
Q07020	60S ribosomal protein L18	RPL18	5	4	5	4	3	3	29845000	19745000	18693000	11450000	10392000	10025000	22761000	1.06223e+07	2.14275	0.0275262	up
Q02543	60S ribosomal protein L18a	RPL18A	6	8	6	5	5	5	10930000	10444000	10091000	6770600	7782800	6365600	1.04883e+07	6973000	1.50413	0.00194709	up
P84098	60S ribosomal protein L19	RPL19	6	5	6	4	5	5	24900000	18068000	16907000	10797000	10404000	13274000	1.99583e+07	1.14917e+07	1.73677	0.0330726	up
P46778	60S ribosomal protein L21	RPL21	5	5	4	2	3	3	20662000	18483000	13912000	9404400	10080000	8956300	1.76857e+07	9.48023e+06	1.86553	0.0152098	up
P62829	60S ribosomal protein L23	RPL23	2	3	2	1	2	1	3427200	3826700	3199800	1841900	1676300	1676900	3.48457e+06	1731700	2.01222	0.000788134	up
P62750	60S ribosomal protein L23a	RPL23A	5	5	5	3	4	5	10507000	6358000	6005700	2721800	3472400	2787900	7.62357e+06	2.99403e+06	2.54625	0.0341868	up
P61254	60S ribosomal protein L26;60S ribosomal protein L26-like 1	RPL26;RPL26L1	8	9	10	2	3	4	15175000	13958000	14738000	1203900	3337000	3448800	1.46237e+07	2.66323e+06	5.49094	0.000123937	up
P61353	60S ribosomal protein L27	RPL27	7	8	7	6	5	5	13889000	13664000	10299000	6568700	6046400	4837000	1.26173e+07	5.81737e+06	2.16891	0.00585561	up
P46776	60S ribosomal protein L27a	RPL27A	6	6	4	5	3	4	13085000	11063000	8701200	5890200	3370100	4541900	1.09497e+07	4.60073e+06	2.38	0.0122013	up
P46779	60S ribosomal protein L28	RPL28	4	3	3	2	1	3	4040800	2741500	4450000	1761900	1301900	2515700	3744100	1.85983e+06	2.01314	0.0393337	up
P47914	60S ribosomal protein L29	RPL29	3	3	3	1	1	0	48216000	40422000	25856000	9567600	13534000	0	3.81647e+07	11550800	3.30407	0.0166272	up
P39023	60S ribosomal protein L3	RPL3	14	12	11	7	9	8	11131000	7661200	7274700	3830700	4912600	4337400	8.68897e+06	4.36023e+06	1.99278	0.0267533	up
P62888	60S ribosomal protein L30	RPL30	4	5	6	4	7	6	12576000	13504000	14568000	6232500	8060800	7518000	1.35493e+07	7.27043e+06	1.86362	0.00136114	up
P62899	60S ribosomal protein L31	RPL31	3	4	4	2	2	4	3967900	3803600	3953400	1175700	719990	2603100	3908300	1.4996e+06	2.60623	0.0133868	up
P62910	60S ribosomal protein L32	RPL32	4	3	3	2	2	3	14672000	10220000	10003000	4100000	2173900	4739800	1.16317e+07	3.67123e+06	3.16833	0.00954009	up
P42766	60S ribosomal protein L35	RPL35	6	6	6	3	1	2	27067000	16257000	14654000	4430800	1009000	3549700	19326000	2996500	6.44952	0.0154603	up
Q969Q0	60S ribosomal protein L36a-like;60S ribosomal protein L36a	RPL36AL;RPL36A	1	2	1	1	1	1	7968000	5518200	4622500	2340300	3165800	3234800	6.03623e+06	2.91363e+06	2.07172	0.0398852	up
P36578	60S ribosomal protein L4	RPL4	27	29	26	19	17	19	33698000	34328000	27116000	12969000	12590000	12278000	31714000	1.26123e+07	2.51452	0.00117644	up
Q02878	60S ribosomal protein L6	RPL6	17	15	14	11	13	11	20202000	16874000	12030000	7045600	8308900	6327000	1.63687e+07	7.22717e+06	2.26488	0.0200673	up
P18124	60S ribosomal protein L7	RPL7	13	12	10	7	9	9	22289000	16665000	22015000	5735400	5921100	9538400	20323000	7.06497e+06	2.87659	0.00388427	up
P62424	60S ribosomal protein L7a	RPL7A	15	18	15	16	12	14	47684000	43240000	36402000	19088000	18148000	18061000	42442000	1.84323e+07	2.30258	0.00189092	up
P62917	60S ribosomal protein L8	RPL8	8	9	10	8	7	6	21242000	15624000	13612000	8322600	6492800	7680200	16826000	7.49853e+06	2.24391	0.0164383	up
P32969	60S ribosomal protein L9	RPL9	4	5	3	1	2	3	2696300	3242200	1384300	310310	833770	950890	2.44093e+06	698323	3.49542	0.0408759	up
P52209	6-phosphogluconate dehydrogenase, decarboxylating	PGD	4	4	5	4	4	5	1334000	904100	1015300	750300	635270	680230	1.08447e+06	688600	1.57489	0.0409792	up
P49588	Alanine--tRNA ligase, cytoplasmic	AARS	2	1	2	1	1	0	97906	62465	112750	0	39729	0	91040.3	39729	2.29153	0.017538	up
P14550	Alcohol dehydrogenase [NADP(+)]	AKR1A1	4	3	2	1	2	1	817610	603150	361220	237840	64561	207500	593993	169967	3.49476	0.0406982	up
P42330	Aldo-keto reductase family 1 member C3;Aldo-keto reductase family 1 member C1;Aldo-keto reductase family 1 member C2;Aldo-keto reductase family 1 member C4	AKR1C3;AKR1C1;AKR1C2;AKR1C4	2	2	1	1	1	0	412990	334100	261530	87736	82206	0	336207	84971	3.95672	0.00583574	up
P06733	Alpha-enolase	ENO1	21	17	18	14	17	16	27019000	23919000	21708000	11271000	13026000	12785000	2.42153e+07	1.23607e+07	1.95906	0.00192221	up
Q9H4A4	Aminopeptidase B	RNPEP	2	2	1	1	0	1	153210	188060	81952	58470	0	46310	141074	52390	2.69277	0.0418571	up
P04083	Annexin A1	ANXA1	20	19	16	13	12	14	27686000	20181000	17550000	6528100	6238400	6124100	2.18057e+07	6.29687e+06	3.46294	0.00696726	up
P07355	Annexin A2;Putative annexin A2-like protein	ANXA2;ANXA2P2	34	32	32	26	30	29	189780000	141850000	138920000	101300000	101820000	86578000	156850000	96566000	1.62428	0.0249105	up
P08758	Annexin A5	ANXA5	18	16	16	14	13	12	12984000	12908000	11237000	7487800	7280100	6577400	1.23763e+07	7115100	1.73945	0.00114555	up
O95994	Anterior gradient protein 2 homolog	AGR2	3	4	3	2	2	2	3237200	2943900	2951800	1348000	1032000	1384700	3044300	1254900	2.42593	0.000266917	up
P63010	AP-2 complex subunit beta;AP-1 complex subunit beta-1	AP2B1;AP1B1	6	5	5	1	1	3	345760	193250	275970	69316	27320	134980	271660	77205.3	3.51867	0.0228423	up
P04114	Apolipoprotein B-100;Apolipoprotein B-48	APOB	0	0	0	3	2	3	0	0	0	38391	23210	35391				0.00223361	down
Q9NWB6	Arginine and glutamate-rich protein 1	ARGLU1	2	3	1	0	0	0	1175600	994040	626020	0	0	0				0.00449459	up
P54136	Arginine--tRNA ligase, cytoplasmic	RARS	4	6	5	2	1	2	406720	401170	280890	146130	110940	187790	362927	148287	2.44747	0.0100401	up
O00192	Armadillo repeat protein deleted in velo-cardio-facial syndrome	ARVCF	5	5	4	3	4	1	199310	186980	129710	85052	113050	30118	172000	76073.3	2.26098	0.0417185	up
P14868	Aspartate--tRNA ligase, cytoplasmic	DARS	8	9	7	7	8	6	823640	805940	659440	548570	548840	273250	763007	456887	1.67001	0.0440927	up
P06576	ATP synthase subunit beta, mitochondrial	ATP5B	6	3	5	5	4	4	498360	319740	379860	273680	234210	237860	399320	248583	1.60638	0.0491445	up
P53396	ATP-citrate synthase	ACLY	11	10	9	8	8	8	650090	599910	487460	304090	299770	213530	579153	272463	2.12562	0.00555322	up
Q01813	ATP-dependent 6-phosphofructokinase, platelet type	PFKP	8	7	4	2	3	3	541290	442520	278670	77358	113700	160480	420827	117179	3.5913	0.0193915	up
O00148	ATP-dependent RNA helicase DDX39A;Spliceosome RNA helicase DDX39B	DDX39A;DDX39B	2	3	2	0	1	0	320230	321510	207140	0	90383	0	282960	90383	3.13068	0.00642259	up
Q9H4G0	Band 4.1-like protein 1	EPB41L1	1	1	0	1	2	2	23959	12889	0	53822	53685	59757	18424	55754.7	0.330448	0.00380686	down
O75531	Barrier-to-autointegration factor;Barrier-to-autointegration factor, N-terminally processed	BANF1	7	7	7	4	6	5	16662000	14940000	19062000	10056000	11591000	5293700	16888000	8.98023e+06	1.88057	0.0242639	up
O95395	Beta-1,3-galactosyl-O-glycosyl-glycoprotein beta-1,6-N-acetylglucosaminyltransferase 3	GCNT3	16	19	16	25	22	19	5932800	5518900	4410000	11453000	9928500	9620300	5.28723e+06	1.03339e+07	0.511638	0.00225474	down
O60513	Beta-1,4-galactosyltransferase 4;N-acetyllactosamine synthase;Lactotriaosylceramide beta-1,4-galactosyltransferase	B4GALT4	2	1	1	0	1	1	352240	271640	216830	0	157270	124810	280237	141040	1.98693	0.0398168	up
P07814	Bifunctional glutamate/proline--tRNA ligase;Glutamate--tRNA ligase;Proline--tRNA ligase	EPRS	13	13	10	10	6	8	545830	460990	417800	325670	238500	291070	474873	285080	1.66575	0.0138583	up
P12644	Bone morphogenetic protein 4	BMP4	0	0	0	2	1	2	0	0	0	249720	93681	289280				0.0241859	down
Q9UQB8	Brain-specific angiogenesis inhibitor 1-associated protein 2	BAIAP2	1	2	2	7	6	6	45333	95777	99926	357500	316260	342560	80345.3	338773	0.237165	0.000264242	down
P11586	C-1-tetrahydrofolate synthase, cytoplasmic;Methylenetetrahydrofolate dehydrogenase;Methenyltetrahydrofolate cyclohydrolase;Formyltetrahydrofolate synthetase;C-1-tetrahydrofolate synthase, cytoplasmic, N-terminally processed	MTHFD1	6	5	4	3	2	5	330930	290280	212170	110820	60429	153230	277793	108160	2.56836	0.0181851	up
P07384	Calpain-1 catalytic subunit	CAPN1	2	3	2	1	2	1	197360	226940	108080	66921	49497	46981	177460	54466.3	3.25816	0.0275066	up
P16152	Carbonyl reductase [NADPH] 1;Carbonyl reductase [NADPH] 3	CBR1;CBR3	2	2	2	0	0	0	284390	122740	235060	0	0	0				0.0110284	up
Q96DG6	Carboxymethylenebutenolidase homolog	CMBL	2	2	1	1	0	1	147780	165460	99759	59330	0	74756	137666	67043	2.0534	0.03653	up
P21964	Catechol O-methyltransferase	COMT	4	4	4	2	3	3	1189900	1079600	916720	378760	381170	474560	1.06207e+06	411497	2.581	0.00159284	up
P13987	CD59 glycoprotein	CD59	5	5	4	4	3	4	17987000	13760000	12462000	5861600	6131700	5448000	1.47363e+07	5.81377e+06	2.53473	0.00603898	up
Q9NX58	Cell growth-regulating nucleolar protein	LYAR	1	1	1	0	0	0	137370	124460	94300	0	0	0				0.000743094	up
Q8WUJ3	Cell migration-inducing and hyaluronan-binding protein	CEMIP	1	3	1	6	7	7	36854	115700	38931	291160	281680	211810	63828.3	261550	0.244039	0.00537787	down
O00299	Chloride intracellular channel protein 1	CLIC1	8	10	10	6	4	8	9370800	9876300	9891200	6629900	2541100	5975500	9.71277e+06	5.04883e+06	1.92376	0.0218655	up
Q9Y696	Chloride intracellular channel protein 4	CLIC4	2	3	2	1	3	1	715160	744630	627260	296390	455480	288000	695683	346623	2.00703	0.0057725	up
Q8NCR9	Clarin-3	CLRN3	0	1	0	2	2	1	0	577670	0	1377900	1289200	878160	577670	1.18175e+06	0.488825	0.0159632	down
Q00610	Clathrin heavy chain 1	CLTC	18	23	20	16	19	15	1534300	1494900	1290500	922900	871380	758150	1439900	850810	1.69239	0.00280145	up
O15551	Claudin-3	CLDN3	5	4	5	3	4	4	11816000	9054200	8386400	3267400	5987100	3692500	9752200	4.31567e+06	2.25972	0.0156704	up
O43809	Cleavage and polyadenylation specificity factor subunit 5	NUDT21	1	1	1	1	1	0	364010	347250	246230	0	134410	0	319163	134410	2.37455	0.00908555	up
P10909	Clusterin;Clusterin beta chain;Clusterin alpha chain	CLU	4	3	3	4	4	4	608820	391560	396670	994560	829530	907970	465683	910687	0.511354	0.00663098	down
Q11201	CMP-N-acetylneuraminate-beta-galactosamide-alpha-2,3-sialyltransferase 1	ST3GAL1	1	0	1	3	4	4	169400	0	214850	624660	548720	657420	192125	610267	0.314821	0.00270449	down
Q9Y678	Coatomer subunit gamma-1	COPG1	2	2	2	2	0	0	104360	104970	89495	50194	0	0	99608.3	50194	1.98447	0.00902828	up
P23528	Cofilin-1	CFL1	8	11	13	10	9	10	42122000	44552000	37612000	25359000	24598000	27183000	4.14287e+07	2.57133e+07	1.61117	0.00193952	up
P39060	Collagen alpha-1(XVIII) chain;Endostatin	COL18A1	1	1	1	1	2	2	24343	59938	61687	91159	103120	158080	48656	117453	0.414259	0.0452379	down
O75131	Copine-3	CPNE3	6	3	4	2	2	2	733000	423590	462470	125800	49492	113190	539687	96160.7	5.61234	0.0114268	up
O75367	Core histone macro-H2A.1	H2AFY	14	16	13	13	13	10	24420000	19932000	15750000	7718900	7081200	9038300	20034000	7.94613e+06	2.52123	0.00926962	up
P12277	Creatine kinase B-type	CKB	3	4	3	3	1	1	1128700	1065500	788950	594810	240650	145680	994383	327047	3.04049	0.017819	up
P46109	Crk-like protein	CRKL	1	1	2	1	1	0	146410	175880	213040	86638	86164	0	178443	86401	2.06529	0.0251947	up
P28838	Cytosol aminopeptidase	LAP3	3	5	3	1	1	0	184390	311910	175990	59375	45228	0	224097	52301.5	4.28471	0.0163261	up
Q9UGM3	Deleted in malignant brain tumors 1 protein	DMBT1	0	0	0	1	1	1	0	0	0	104600	93476	94930				9.71036e-06	down
Q9Y315	Deoxyribose-phosphate aldolase	DERA	1	1	1	0	0	0	118720	54200	76526	0	0	0				0.0117335	up
Q16555	Dihydropyrimidinase-related protein 2	DPYSL2	1	1	1	0	0	0	80304	66785	62296	0	0	0				0.000208475	up
P53634	Dipeptidyl peptidase 1;Dipeptidyl peptidase 1 exclusion domain chain;Dipeptidyl peptidase 1 heavy chain;Dipeptidyl peptidase 1 light chain	CTSC	2	2	2	1	0	0	211660	200020	181020	27220	0	0	197567	27220	7.25814	0.000121129	up
Q9P265	Disco-interacting protein 2 homolog B	DIP2B	9	12	8	7	7	6	440520	490710	362150	213380	246860	226830	431127	229023	1.88246	0.00638894	up
P11387	DNA topoisomerase 1	TOP1	12	9	7	2	6	3	1901000	1567000	1345300	359280	460340	324820	1.60443e+06	381480	4.20581	0.00183135	up
P11388	DNA topoisomerase 2-alpha;DNA topoisomerase 2-beta	TOP2A;TOP2B	2	2	2	1	1	0	78638	91843	73355	0	31034	0	81278.7	31034	2.61902	0.0037547	up
P04843	Dolichyl-diphosphooligosaccharide--protein glycosyltransferase subunit 1	RPN1	7	6	7	1	2	2	369060	338900	423390	0	56455	67734	377117	62094.5	6.07327	0.000490022	up
P04844	Dolichyl-diphosphooligosaccharide--protein glycosyltransferase subunit 2	RPN2	2	2	2	1	1	0	201380	176210	159820	101140	79637	0	179137	90388.5	1.98185	0.0228241	up
P26641	Elongation factor 1-gamma	EEF1G	6	5	5	3	4	5	1578700	982400	1122000	552530	684930	729930	1227700	655797	1.87207	0.0381884	up
P13639	Elongation factor 2	EEF2	13	12	12	8	9	11	2539600	1974700	1401800	778220	763260	1092200	1.97203e+06	877893	2.24632	0.033967	up
P49411	Elongation factor Tu, mitochondrial	TUFM	2	2	2	1	2	2	155680	123450	132480	51907	98893	102770	137203	84523.3	1.62326	0.0498702	up
P14625	Endoplasmin	HSP90B1	8	7	7	3	5	3	938120	723640	609930	245390	352590	227850	757230	275277	2.7508	0.00971669	up
P29317	Ephrin type-A receptor 2	EPHA2	5	4	4	7	5	7	328320	256940	237530	556720	451870	463340	274263	490643	0.558987	0.00743116	down
P54760	Ephrin type-B receptor 4	EPHB4	3	1	3	3	2	1	531800	390260	448100	284770	274570	116250	456720	225197	2.02809	0.0275274	up
Q12929	Epidermal growth factor receptor kinase substrate 8	EPS8	6	8	8	13	12	12	972780	1134300	999380	2067400	1960800	1806300	1.03549e+06	1.94483e+06	0.53243	0.000558811	down
Q8TE68	Epidermal growth factor receptor kinase substrate 8-like protein 1	EPS8L1	3	2	3	5	5	6	218510	129320	140880	387650	424960	386250	162903	399620	0.407646	0.00152988	down
P60842	Eukaryotic initiation factor 4A-I;Eukaryotic initiation factor 4A-II;Eukaryotic initiation factor 4A-II, N-terminally processed	EIF4A1;EIF4A2	7	8	5	6	6	6	1207500	1643600	1270700	638790	684940	812670	1.37393e+06	712133	1.92932	0.0104699	up
Q04637	Eukaryotic translation initiation factor 4 gamma 1	EIF4G1	1	1	1	0	0	0	25387	25062	24958	0	0	0				4.18798e-09	up
O14980	Exportin-1	XPO1	3	1	2	0	0	0	110440	54883	77870	0	0	0				0.00733524	up
P55060	Exportin-2	CSE1L	3	2	2	2	1	1	146560	83936	103110	65679	27979	39981	111202	44546.3	2.49632	0.0367524	up
Q14CZ7	FAST kinase domain-containing protein 3	FASTKD3	1	1	1	1	1	1	3335800	3321000	2963600	4514500	6734700	5329500	3206800	5.52623e+06	0.580287	0.0245455	down
P49327	Fatty acid synthase;[Acyl-carrier-protein] S-acetyltransferase;[Acyl-carrier-protein] S-malonyltransferase;3-oxoacyl-[acyl-carrier-protein] synthase;3-oxoacyl-[acyl-carrier-protein] reductase;3-hydroxyacyl-[acyl-carrier-protein] dehydratase;Enoyl-[acyl-carrier-protein] reductase;Oleoyl-[acyl-carrier-protein] hydrolase	FASN	46	46	43	41	41	40	3355900	2787800	2289800	1752400	1516800	1653100	2.81117e+06	1.64077e+06	1.71333	0.0206513	up
P02751	Fibronectin;Anastellin;Ugl-Y1;Ugl-Y2;Ugl-Y3	FN1	0	0	0	3	3	3	0	0	0	58492	65486	62636				6.76356e-06	down
P04075	Fructose-bisphosphate aldolase A	ALDOA	15	15	13	15	12	13	13997000	11345000	10472000	7718200	7346600	6702000	11938000	7255600	1.64535	0.0131153	up
P09972	Fructose-bisphosphate aldolase C	ALDOC	2	2	3	1	1	1	1074500	1131300	847790	296890	344670	232660	1.01786e+06	291407	3.49293	0.00141918	up
P17931	Galectin-3	LGALS3	3	1	2	1	2	1	1369900	808410	1255400	0	643640	369270	1144570	506455	2.25996	0.0333182	up
Q08380	Galectin-3-binding protein	LGALS3BP	20	21	23	23	24	24	83670000	83050000	71231000	141070000	132250000	137140000	79317000	136820000	0.579718	0.000274636	down
P56470	Galectin-4	LGALS4	14	12	12	8	7	7	42038000	33164000	34169000	6813500	6661000	5771700	36457000	6415400	5.68273	0.00044231	up
P06396	Gelsolin	GSN	13	17	13	8	8	6	3739200	3020000	2703200	1334900	1134300	814670	3.15413e+06	1.09462e+06	2.88148	0.00382621	up
P06744	Glucose-6-phosphate isomerase	GPI	10	6	7	7	7	6	3308900	1887900	2345500	1063900	1056900	1167900	2514100	1.09623e+06	2.2934	0.0279571	up
Q06210	Glutamine--fructose-6-phosphate aminotransferase [isomerizing] 1	GFPT1	5	3	4	2	2	3	458790	402100	412120	120030	176130	133830	424337	143330	2.96056	0.000318856	up
Q9Y2Q3	Glutathione S-transferase kappa 1	GSTK1	1	1	1	0	1	0	227720	134580	146210	0	85361	0	169503	85361	1.98572	0.0259729	up
P09211	Glutathione S-transferase P	GSTP1	5	5	7	7	5	5	9489700	8581200	8149600	6445700	3341400	4944900	8.74017e+06	4.91067e+06	1.77983	0.0173961	up
P04406	Glyceraldehyde-3-phosphate dehydrogenase	GAPDH	17	15	16	11	15	15	53851000	43208000	38685000	25599000	28479000	27236000	45248000	2.71047e+07	1.66938	0.0165614	up
P11216	Glycogen phosphorylase, brain form	PYGB	21	25	23	13	13	14	3694700	3321700	2721000	1214600	1205800	1482900	3245800	1301100	2.49466	0.00284259	up
O75487	Glypican-4;Secreted glypican-4	GPC4	2	1	1	0	1	0	156890	88395	64324	0	44160	0	103203	44160	2.33702	0.0478993	up
Q8NBJ4	Golgi membrane protein 1	GOLM1	1	1	1	0	0	0	64691	68555	66425	0	0	0				4.75754e-07	up
Q9UBI6	Guanine nucleotide-binding protein G(I)/G(S)/G(O) subunit gamma-12	GNG12	3	3	2	5	4	3	2678900	1965000	1075600	12615000	13149000	11032000	1906500	1.22653e+07	0.155438	0.000192274	down
P63244	Guanine nucleotide-binding protein subunit beta-2-like 1;Guanine nucleotide-binding protein subunit beta-2-like 1, N-terminally processed	GNB2L1	11	13	14	8	9	8	4510200	6013300	4940500	3045600	2863300	2573100	5.15467e+06	2.82733e+06	1.82315	0.00761381	up
Q9NY12	H/ACA ribonucleoprotein complex subunit 1	GAR1	3	3	2	2	2	2	1643300	1236100	1534700	647580	756890	897090	1.47137e+06	767187	1.91787	0.00762452	up
O60832	H/ACA ribonucleoprotein complex subunit 4	DKC1	8	8	6	6	4	2	1094400	1119300	683160	495620	373340	235260	965620	368073	2.62344	0.0202832	up
Q92598	Heat shock protein 105 kDa	HSPH1	4	1	3	1	3	3	363230	249960	327530	92014	129310	118610	313573	113311	2.76736	0.00472613	up
P04792	Heat shock protein beta-1	HSPB1	2	2	2	2	2	1	738250	531650	559930	476690	283300	313200	609943	357730	1.70504	0.0460814	up
P07900	Heat shock protein HSP 90-alpha	HSP90AA1	10	11	13	9	7	9	3272800	2989700	2563200	1349600	1471200	1405200	2941900	1.40867e+06	2.08843	0.00184481	up
P08238	Heat shock protein HSP 90-beta	HSP90AB1	15	12	16	11	13	14	23846000	20375000	19093000	8592300	8230300	9553800	2.11047e+07	8.79213e+06	2.4004	0.00112192	up
O14792	Heparan sulfate glucosamine 3-O-sulfotransferase 1	HS3ST1	0	0	1	1	1	1	0	0	43366	80712	75145	75312	43366	77056.3	0.562783	0.0126815	down
O14964	Hepatocyte growth factor-regulated tyrosine kinase substrate	HGS	1	1	1	0	1	1	11917000	6554600	7473200	0	4160800	3677600	8.64827e+06	3919200	2.20664	0.0461414	up
Q5SSJ5	Heterochromatin protein 1-binding protein 3	HP1BP3	2	2	2	1	1	2	439540	406150	484320	74875	91994	172200	443337	113023	3.92253	0.000924628	up
P31943	Heterogeneous nuclear ribonucleoprotein H;Heterogeneous nuclear ribonucleoprotein H, N-terminally processed;Heterogeneous nuclear ribonucleoprotein H2	HNRNPH1;HNRNPH2	1	1	1	1	1	0	825030	620480	884290	187650	254130	228920	776600	223567	3.47368	0.00254558	up
P61978	Heterogeneous nuclear ribonucleoprotein K	HNRNPK	7	5	8	6	8	7	2755900	2157400	2397600	1427800	1369100	1487700	2.43697e+06	1428200	1.70632	0.00470596	up
P14866	Heterogeneous nuclear ribonucleoprotein L	HNRNPL	2	3	2	1	1	1	340520	495550	365700	108340	90979	91718	400590	97012.3	4.12927	0.00328935	up
O60506	Heterogeneous nuclear ribonucleoprotein Q	SYNCRIP	5	4	4	2	1	1	889060	555770	483540	211190	140540	184090	642790	178607	3.59891	0.0214411	up
Q00839	Heterogeneous nuclear ribonucleoprotein U	HNRNPU	8	9	10	10	10	7	4466200	3327900	3513100	1882800	2016100	1472300	3.76907e+06	1790400	2.10515	0.00703302	up
P07910	Heterogeneous nuclear ribonucleoproteins C1/C2;Heterogeneous nuclear ribonucleoprotein C-like 4;Heterogeneous nuclear ribonucleoprotein C-like 1;Heterogeneous nuclear ribonucleoprotein C-like 3;Heterogeneous nuclear ribonucleoprotein C-like 2	HNRNPC;HNRNPCL4;HNRNPCL1;HNRNPCL3;HNRNPCL2	10	11	9	7	7	9	6775000	4691300	5266700	2477900	2163400	2874600	5.57767e+06	2505300	2.22635	0.00934689	up
P17096	High mobility group protein HMG-I/HMG-Y	HMGA1	5	4	5	2	1	3	25886000	27576000	31336000	1474000	452550	1853100	28266000	1.25988e+06	22.4354	8.43498e-05	up
P49773	Histidine triad nucleotide-binding protein 1	HINT1	1	1	1	0	0	1	732700	728610	680780	0	0	427600	714030	427600	1.66986	0.0163679	up
P16403	Histone H1.2	HIST1H1C	5	5	5	5	5	5	52678000	48507000	36905000	22185000	19550000	32884000	46030000	24873000	1.8506	0.0274622	up
P16402	Histone H1.3	HIST1H1D	3	3	3	3	3	3	12904000	10817000	9920900	6322300	7664800	6253000	1.1214e+07	6746700	1.66214	0.0109475	up
P10412	Histone H1.4	HIST1H1E	4	4	2	3	4	3	203270000	158280000	147710000	66574000	92818000	70806000	1.69753e+08	7.67327e+07	2.21227	0.0078852	up
P16401	Histone H1.5	HIST1H1B	12	13	14	13	10	14	112410000	104220000	101220000	52699000	62582000	55216000	105950000	5.68323e+07	1.86426	0.000389579	up
Q71UI9	Histone H2A.V;Histone H2A.Z	H2AFV;H2AFZ	2	2	2	2	2	2	13987000	12072000	11133000	8066100	7182800	8810300	1.23973e+07	8.01973e+06	1.54585	0.0104341	up
P16104	Histone H2AX	H2AFX	1	1	1	0	0	0	16827000	11574000	11306000	0	0	0				0.00181173	up
Q16778	Histone H2B type 2-E;Histone H2B type 1-B;Histone H2B type 1-O;Histone H2B type 1-J;Putative histone H2B type 2-D;Putative histone H2B type 2-C	HIST2H2BE;HIST1H2BB;HIST1H2BO;HIST1H2BJ;HIST2H2BD;HIST2H2BC	1	1	1	0	0	0	37328000	35732000	33378000	18473000	19846000	21401000	3.54793e+07	1.99067e+07	1.78228	0.000398537	up
Q71DI3	Histone H3.2;Histone H3.1t;Histone H3.1;Histone H3.3C	HIST2H3A;HIST3H3;HIST1H3A;H3F3C	1	2	1	1	1	2	457050000	411030000	307360000	194640000	222630000	232050000	3.91813e+08	216440000	1.81026	0.0184598	up
P84243	Histone H3.3	H3F3A	1	1	1	0	0	0	1749000	1261300	1182500	0	0	0				0.00139635	up
P62805	Histone H4	HIST1H4A	16	12	14	11	12	11	1001000000	772220000	689880000	479930000	481670000	462990000	8.21033e+08	4.74863e+08	1.72899	0.0206204	up
Q9Y6R7	IgGFc-binding protein	FCGBP	31	29	32	16	21	20	1384700	974950	988900	423310	480590	435050	1.11618e+06	446317	2.50088	0.00778618	up
Q969P0	Immunoglobulin superfamily member 8	IGSF8	8	8	7	5	5	4	1905200	1895200	1466100	733480	1014900	830210	1755500	859530	2.0424	0.00577853	up
Q14974	Importin subunit beta-1	KPNB1	3	3	3	2	2	1	267170	303400	160360	96161	110780	34101	243643	80347.3	3.03238	0.0289403	up
Q96P70	Importin-9	IPO9	1	1	1	1	1	1	123960	125590	69582	34691	51582	32180	106377	39484.3	2.69417	0.0260398	up
Q12906	Interleukin enhancer-binding factor 3	ILF3	4	6	3	1	1	1	256210	286810	296130	57696	22101	54076	279717	44624.3	6.26825	0.000141998	up
O43240	Kallikrein-10	KLK10	4	4	5	4	4	3	3956900	3513900	2631800	1187600	1239000	950740	3.36753e+06	1125780	2.99129	0.00495325	up
P20700	Lamin-B1	LMNB1	1	1	1	0	0	0	78058	71032	65241	0	0	0				4.26593e-05	up
O15230	Laminin subunit alpha-5	LAMA5	31	23	28	36	39	35	795280	469700	628620	1134900	1184400	1374400	631200	1.23123e+06	0.512657	0.00727264	down
P07942	Laminin subunit beta-1	LAMB1	12	14	9	23	26	24	603780	693360	421480	1560900	1557200	1548800	572873	1.55563e+06	0.368257	0.000253106	down
P11047	Laminin subunit gamma-1	LAMC1	17	16	17	20	23	25	963280	921290	889570	1595800	1734600	1844000	924713	1724800	0.536128	0.000435581	down
Q01650	Large neutral amino acids transporter small subunit 1	SLC7A5	2	3	3	3	1	2	1285000	879980	1069100	587300	543430	408040	1.07803e+06	512923	2.10173	0.0118196	up
Q08722	Leukocyte surface antigen CD47	CD47	0	0	1	2	2	2	0	0	220940	387510	339150	514170	220940	413610	0.534175	0.0196638	down
P00338	L-lactate dehydrogenase A chain	LDHA	10	11	14	9	9	10	18013000	13704000	15617000	6334700	6468700	7495500	15778000	6766300	2.33185	0.00226913	up
P07195	L-lactate dehydrogenase B chain	LDHB	7	8	10	8	7	7	7918800	5941800	6175000	4302600	4825500	4036300	6.67853e+06	4.38813e+06	1.52195	0.026249	up
O95232	Luc7-like protein 3	LUC7L3	3	2	3	0	0	0	245690	141450	217110	0	0	0				0.00292844	up
P19256	Lymphocyte function-associated antigen 3	CD58	1	2	1	0	0	0	403170	716190	338440	0	0	0				0.0140735	up
P38571	Lysosomal acid lipase/cholesteryl ester hydrolase	LIPA	1	1	1	0	0	0	175280	191110	167840	0	0	0				1.3095e-05	up
Q14108	Lysosome membrane protein 2	SCARB2	2	3	2	1	0	1	383240	420020	296600	108570	0	134270	366620	121420	3.01944	0.0065681	up
P11279	Lysosome-associated membrane glycoprotein 1	LAMP1	3	3	4	2	2	3	4312100	3143700	3818400	972550	1102800	1534100	3.75807e+06	1203150	3.12352	0.00251803	up
P61626	Lysozyme C	LYZ	6	6	6	5	6	5	9800000	13673000	10766000	8317900	5699900	6294500	11413000	6.77077e+06	1.68563	0.0300181	up
Q96JB6	Lysyl oxidase homolog 4	LOXL4	1	0	0	2	2	2	16877	0	0	83958	92512	74187	16877	83552.3	0.201993	0.000543294	down
Q8NDC0	MAPK-interacting and spindle-stabilizing protein-like	MAPK1IP1L	0	0	0	1	1	1	0	0	0	2704800	2234400	2183400				0.000138682	down
P53985	Monocarboxylate transporter 1	SLC16A1	2	2	2	1	1	0	1872500	1272600	1365500	471670	362100	0	1.50353e+06	416885	3.60659	0.0064144	up
Q9UKD2	mRNA turnover protein 4 homolog	MRTO4	2	3	3	1	1	1	768400	897630	1211200	240350	195440	181160	959077	205650	4.66364	0.00474503	up
P98088	Mucin-5AC	MUC5AC	33	36	34	43	45	45	1963400	1622800	1484100	3075800	3540800	3364000	1690100	3.32687e+06	0.508016	0.00113665	down
P22234	Multifunctional protein ADE2;Phosphoribosylaminoimidazole-succinocarboxamide synthase;Phosphoribosylaminoimidazole carboxylase	PAICS	7	6	8	5	5	4	2140600	1754900	1877900	1167000	807140	795520	1.92447e+06	923220	2.08452	0.00387245	up
O95297	Myelin protein zero-like protein 1	MPZL1	4	3	3	1	2	1	1643200	1102900	985290	334330	624880	412690	1.2438e+06	457300	2.71987	0.0233993	up
P15559	NAD(P)H dehydrogenase [quinone] 1	NQO1	8	6	7	8	5	8	3632100	3493100	2940000	1725000	1846600	2417600	3.35507e+06	1996400	1.68056	0.0106401	up
Q6UXI9	Nephronectin	NPNT	0	0	1	2	2	1	0	0	42638	102090	119160	59869	42638	93706.3	0.455017	0.0246415	down
Q14697	Neutral alpha-glucosidase AB	GANAB	19	17	18	23	21	21	3025600	1866000	1900900	4036400	3779800	3649400	2.26417e+06	3.82187e+06	0.592424	0.0172594	down
Q92542	Nicastrin	NCSTN	2	1	2	0	1	1	98019	51582	85625	0	34804	20787	78408.7	27795.5	2.82091	0.0251996	up
Q6XQN6	Nicotinate phosphoribosyltransferase	NAPRT	1	1	1	0	0	0	95457	77483	66493	0	0	0				0.000698116	up
Q8TBK2	N-lysine methyltransferase SETD6	SETD6	1	1	1	1	1	1	4527000	3397800	3475600	405870	845710	525340	3.80013e+06	592307	6.41582	0.00115741	up
O00567	Nucleolar protein 56	NOP56	8	7	3	3	1	3	912880	1162700	348600	127210	74658	137600	808060	113156	7.14111	0.0451669	up
Q9Y2X3	Nucleolar protein 58	NOP58	7	5	4	1	4	2	614450	523930	415740	75637	261450	132540	518040	156542	3.30926	0.0104406	up
Q9NR30	Nucleolar RNA helicase 2	DDX21	19	16	13	10	11	15	2740800	2509100	1616400	983000	1063400	1480800	2.28877e+06	1.17573e+06	1.94667	0.0415127	up
P19338	Nucleolin	NCL	10	13	9	6	7	8	1769700	1652900	1262300	396880	362180	448100	1.56163e+06	402387	3.88093	0.00172701	up
P06748	Nucleophosmin	NPM1	12	9	11	8	5	7	18878000	9964100	11959000	4369800	3310500	5076300	1.36004e+07	4252200	3.19843	0.0272703	up
O75607	Nucleoplasmin-3	NPM3	1	1	1	1	1	1	352520	287940	393350	249730	191770	216180	344603	219227	1.5719	0.0230884	up
Q9NTK5	Obg-like ATPase 1	OLA1	1	1	2	1	1	1	116530	133510	191050	0	0	60177	147030	60177	2.44329	0.0136175	up
P23284	Peptidyl-prolyl cis-trans isomerase B	PPIB	5	6	5	4	4	6	3716300	3143000	2192000	1694600	1151100	1727500	3017100	1524400	1.9792	0.0363756	up
Q02790	Peptidyl-prolyl cis-trans isomerase FKBP4;Peptidyl-prolyl cis-trans isomerase FKBP4, N-terminally processed	FKBP4	2	2	3	1	2	2	177330	219240	213180	99492	122750	98294	203250	106845	1.90228	0.00325013	up
Q13526	Peptidyl-prolyl cis-trans isomerase NIMA-interacting 1	PIN1	2	2	1	1	0	1	596940	558210	278120	147510	0	144940	477757	146225	3.26727	0.027126	up
P32119	Peroxiredoxin-2	PRDX2	4	4	4	4	0	2	1375400	974870	799070	679400	0	300000	1049780	489700	2.14372	0.0498468	up
P30041	Peroxiredoxin-6	PRDX6	6	5	4	3	4	2	1848400	1485500	1335000	458880	504070	272220	1556300	411723	3.77997	0.00243064	up
Q9NSD9	Phenylalanine--tRNA ligase beta subunit	FARSB	2	2	1	0	0	0	70669	35163	23288	0	0	0				0.0390151	up
P00558	Phosphoglycerate kinase 1	PGK1	18	15	15	11	14	12	9304700	7456800	6446000	4248900	4447700	4150700	7.73583e+06	4.28243e+06	1.80641	0.0148058	up
P18669	Phosphoglycerate mutase 1	PGAM1	5	3	3	2	2	2	2734900	1995300	1883900	1067600	1085100	1017700	2204700	1056800	2.0862	0.0127834	up
P68402	Platelet-activating factor acetylhydrolase IB subunit beta	PAFAH1B2	1	1	1	1	0	1	933150	572710	411610	244130	0	220020	639157	232075	2.7541	0.0485082	up
Q15365	Poly(rC)-binding protein 1	PCBP1	4	4	4	3	5	3	5147400	4025700	3993400	2410900	2594600	2075700	4.38883e+06	2360400	1.85936	0.00768753	up
Q15366	Poly(rC)-binding protein 2	PCBP2	4	4	5	4	4	4	12578000	11570000	12317000	6096600	7976200	7996400	12155000	7356400	1.6523	0.0023529	up
P11940	Polyadenylate-binding protein 1	PABPC1	10	9	9	7	7	7	3531900	3040600	2813300	1519500	922980	1253300	3128600	1.23193e+06	2.5396	0.0022665	up
Q13310	Polyadenylate-binding protein 4	PABPC4	1	1	1	0	0	0	82285	81484	29231	0	0	0				0.0214825	up
P26599	Polypyrimidine tract-binding protein 1	PTBP1	3	3	2	1	1	1	520460	474790	338320	51422	157830	176210	444523	128487	3.45967	0.0092549	up
Q9UHV9	Prefoldin subunit 2	PFDN2	0	0	1	1	1	1	0	0	122390	287090	192790	237660	122390	239180	0.511707	0.0155469	down
P02545	Prelamin-A/C;Lamin-A/C	LMNA	15	15	11	7	8	9	1804700	1607100	1045600	564620	598080	595740	1485800	586147	2.53486	0.0167854	up
O43143	Pre-mRNA-splicing factor ATP-dependent RNA helicase DHX15	DHX15	3	3	3	1	1	1	206650	152430	266680	54121	44299	57844	208587	52088	4.00451	0.00925412	up
O60568	Procollagen-lysine,2-oxoglutarate 5-dioxygenase 3	PLOD3	0	0	0	1	1	2	0	0	0	42904	22217	49117				0.0094268	down
P07737	Profilin-1	PFN1	7	5	5	7	7	7	15398000	12367000	10399000	8156100	7351900	5718400	1.27213e+07	7.07547e+06	1.79795	0.0252924	up
P35080	Profilin-2	PFN2	1	2	1	0	1	1	932630	1053000	482870	0	386960	275750	822833	331355	2.48324	0.0444894	up
Q9UQ80	Proliferation-associated protein 2G4	PA2G4	1	3	2	1	1	1	306350	303860	204620	127660	38057	148330	271610	104682	2.59461	0.0247763	up
P48147	Prolyl endopeptidase	PREP	1	1	1	0	0	0	38665	24980	23939	0	0	0				0.00353933	up
O43490	Prominin-1	PROM1	7	9	6	4	5	3	584020	997130	534760	302520	322730	226170	705303	283807	2.48515	0.0478805	up
Q92530	Proteasome inhibitor PI31 subunit	PSMF1	1	1	1	1	1	1	226530	197180	165190	146040	93562	74369	196300	104657	1.87565	0.0300158	up
P25786	Proteasome subunit alpha type-1	PSMA1	7	7	8	5	5	5	4148100	2879400	3140400	710460	1435000	973640	3389300	1039700	3.25988	0.0059725	up
P25789	Proteasome subunit alpha type-4	PSMA4	6	8	8	4	6	7	4835700	4797900	3190600	827900	1155200	2081700	4.27473e+06	1.35493e+06	3.15494	0.0114455	up
P28066	Proteasome subunit alpha type-5	PSMA5	7	7	5	5	5	4	7799500	6534900	4707900	3308500	3899700	2614800	6.34743e+06	3.27433e+06	1.93854	0.0340417	up
P60900	Proteasome subunit alpha type-6	PSMA6	6	4	5	5	5	5	4213300	2761600	2609400	1282600	1512700	1360900	3.19477e+06	1385400	2.30602	0.024689	up
O14818	Proteasome subunit alpha type-7;Proteasome subunit alpha type-7-like	PSMA7;PSMA8	9	10	9	9	7	7	10443000	8226300	7582700	4358400	3830700	3953100	8.75067e+06	4047400	2.16205	0.00592809	up
P20618	Proteasome subunit beta type-1	PSMB1	5	5	4	3	1	1	2224300	1989300	1393900	625210	292430	189350	1.86917e+06	368997	5.06554	0.00585091	up
P28074	Proteasome subunit beta type-5	PSMB5	7	5	8	4	4	3	2586500	1793600	2368300	848270	979970	886610	2.24947e+06	904950	2.48574	0.00496183	up
P28062	Proteasome subunit beta type-8	PSMB8	3	3	3	2	2	2	625190	944960	805180	536160	328870	366520	791777	410517	1.92873	0.0274689	up
Q99873	Protein arginine N-methyltransferase 1	PRMT1	7	3	6	4	3	4	816750	503670	612930	300000	175230	273650	644450	249627	2.58166	0.0164488	up
Q8WUW1	Protein BRICK1	BRK1	0	0	0	1	1	2	0	0	0	405000	460190	559730				0.000466679	down
P07237	Protein disulfide-isomerase	P4HB	6	7	7	3	4	5	878390	783910	756610	309360	287030	539290	806303	378560	2.12992	0.00849631	up
P13667	Protein disulfide-isomerase A4	PDIA4	4	3	2	1	1	2	346750	288420	147510	44337	76174	90565	260893	70358.7	3.70805	0.034876	up
Q15084	Protein disulfide-isomerase A6	PDIA6	8	8	6	3	4	3	2507500	2418000	1443300	538650	665110	272770	2.12293e+06	492177	4.31336	0.0105657	up
P49257	Protein ERGIC-53	LMAN1	1	1	1	0	1	0	106590	105280	102770	0	26867	0	104880	26867	3.90367	0.000443729	up
Q9NUQ9	Protein FAM49B	FAM49B	2	2	2	0	1	0	231410	226990	264760	0	56080	0	241053	56080	4.29838	0.000555707	up
Q92597	Protein NDRG1	NDRG1	1	1	1	1	0	1	446240	328350	278020	146440	0	183930	350870	165185	2.1241	0.0326688	up
Q9UGV2	Protein NDRG3	NDRG3	1	1	1	1	0	0	134520	184980	145900	95603	0	0	155133	95603	1.62268	0.0251728	up
O15297	Protein phosphatase 1D	PPM1D	1	1	1	1	1	1	39112000	37297000	30972000	19982000	19753000	17381000	3.57937e+07	1.90387e+07	1.88005	0.00299856	up
Q9P258	Protein RCC2	RCC2	1	1	1	0	0	0	67367	73149	64358	0	0	0				1.20976e-05	up
Q01105	Protein SET;Protein SETSIP	SET;SETSIP	2	1	2	0	1	0	665970	260060	591260	0	139170	0	505763	139170	3.63414	0.0260089	up
Q9C0H2	Protein tweety homolog 3	TTYH3	2	3	2	1	1	1	1089200	1184200	1196200	809960	109210	626380	1.15653e+06	515183	2.2449	0.0392374	up
Q14517	Protocadherin Fat 1;Protocadherin Fat 1, nuclear form	FAT1	1	2	0	8	5	8	0	20436	0	70065	58077	73197	20436	67113	0.304501	0.00184141	down
Q08174	Protocadherin-1	PCDH1	0	0	0	1	1	1	0	0	0	47700	38030	38855				0.000178447	down
P00491	Purine nucleoside phosphorylase	PNP	1	1	1	1	0	1	125380	119520	91197	54501	0	74933	112032	64717	1.73111	0.0495313	up
P55786	Puromycin-sensitive aminopeptidase	NPEPPS	2	1	1	1	0	0	68713	50599	45759	14531	0	0	55023.7	14531	3.78664	0.00412118	up
Q5VTE0	Putative elongation factor 1-alpha-like 3;Elongation factor 1-alpha 1;Elongation factor 1-alpha 2	EEF1A1P5;EEF1A1;EEF1A2	18	16	14	13	13	15	32263000	28262000	21216000	15997000	14631000	18499000	27247000	1.63757e+07	1.66387	0.0336341	up
Q58FF8	Putative heat shock protein HSP 90-beta 2	HSP90AB2P	1	1	1	0	1	0	236200	172180	182780	0	89238	0	197053	89238	2.20818	0.00943847	up
Q9HCE1	Putative helicase MOV-10	MOV10	4	4	5	3	3	3	213220	200660	281440	104510	136800	123820	231773	121710	1.90431	0.0147564	up
O00764	Pyridoxal kinase	PDXK	1	1	1	0	0	0	156280	143610	152820	0	0	0				2.35482e-06	up
P14618	Pyruvate kinase PKM	PKM	30	26	23	24	23	25	20288000	16459000	14446000	10374000	9657400	9646600	1.70643e+07	9.89267e+06	1.72495	0.0143185	up
P63000	Ras-related C3 botulinum toxin substrate 1;Ras-related C3 botulinum toxin substrate 3	RAC1;RAC3	7	6	8	7	7	7	12406000	9126300	10424000	8213800	6019300	6804100	10652100	7012400	1.51904	0.0339845	up
P62491	Ras-related protein Rab-11A;Ras-related protein Rab-11B	RAB11A;RAB11B	6	7	7	4	4	4	5547900	4639700	4154400	2073700	1899500	2120800	4.78067e+06	2.03133e+06	2.35346	0.00266636	up
P51153	Ras-related protein Rab-13	RAB13	1	1	1	0	0	0	135060	138540	124900	0	0	0				5.36884e-06	up
P61019	Ras-related protein Rab-2A	RAB2A	3	2	2	1	0	0	630800	763580	783680	153650	118250	140930	726020	137610	5.27592	0.000277152	up
P51148	Ras-related protein Rab-5C	RAB5C	2	3	3	0	1	1	515540	522780	795610	0	199940	218960	611310	209450	2.91864	0.0151657	up
P51149	Ras-related protein Rab-7a	RAB7A	7	7	5	4	6	5	4944500	3152400	3061200	759270	1566300	1347100	3.71937e+06	1.22422e+06	3.03814	0.0193093	up
P10586	Receptor-type tyrosine-protein phosphatase F	PTPRF	2	1	2	0	1	1	35684	20540	35574	0	6500.3	8494.2	30599.3	7497.25	4.08141	0.0105409	up
Q9NQC3	Reticulon-4	RTN4	3	4	4	2	4	3	611470	693620	480500	197890	378150	383980	595197	320007	1.85995	0.0341724	up
P00352	Retinal dehydrogenase 1	ALDH1A1	11	11	15	8	8	9	4028900	4489300	4401300	2475100	2113500	2533700	4306500	2374100	1.81395	0.000557158	up
O76021	Ribosomal L1 domain-containing protein 1	RSL1D1	18	20	14	8	7	9	5534800	5786800	3584300	1199400	1095900	1186500	4.96863e+06	1160600	4.28109	0.00545043	up
Q8TDN6	Ribosome biogenesis protein BRX1 homolog	BRIX1	3	3	1	1	0	1	602920	499110	247200	98281	0	105250	449743	101766	4.41941	0.0262396	up
Q15050	Ribosome biogenesis regulatory protein homolog	RRS1	2	1	2	0	0	0	331570	205100	440840	0	0	0				0.00875121	up
Q9H7B2	Ribosome production factor 2 homolog	RPF2	1	1	1	0	0	0	231340	213090	177400	0	0	0				0.000196906	up
Q96E39	RNA binding motif protein, X-linked-like-1;RNA-binding motif protein, X chromosome;RNA-binding motif protein, X chromosome, N-terminally processed;RNA-binding motif protein, X-linked-like-2;RNA-binding motif protein, X-linked-like-3	RBMXL1;RBMX;RBMXL2;RBMXL3	2	1	2	0	0	0	153620	64697	122700	0	0	0				0.0120496	up
P22087	rRNA 2-O-methyltransferase fibrillarin	FBL	6	5	6	3	1	3	2666500	1401500	1930700	442000	315130	511510	1.99957e+06	422880	4.72845	0.0131926	up
P16615	Sarcoplasmic/endoplasmic reticulum calcium ATPase 2	ATP2A2	2	2	2	2	1	2	124220	164810	115750	79089	49455	72862	134927	67135.3	2.00977	0.0183574	up
O15127	Secretory carrier-associated membrane protein 2	SCAMP2	1	1	1	0	0	0	303090	216460	206470	0	0	0				0.00139628	up
O14828	Secretory carrier-associated membrane protein 3	SCAMP3	1	1	1	0	1	1	317620	268310	247350	0	96895	136460	277760	116678	2.38058	0.0118008	up
Q9UHD8	Septin-9	2018-09-09	0	0	0	2	2	1	0	0	0	114490	104550	54860				0.00776139	down
Q8IYB3	Serine/arginine repetitive matrix protein 1	SRRM1	4	3	2	1	2	1	382730	327160	173060	0	126130	65597	294317	95863.5	3.07016	0.0336306	up
Q9UQ35	Serine/arginine repetitive matrix protein 2	SRRM2	2	2	1	0	0	0	70260	43796	16744	0	0	0				0.0477223	up
Q07955	Serine/arginine-rich splicing factor 1	SRSF1	10	11	12	4	5	6	8352500	7871300	6305300	1648400	1980900	2011100	7509700	1.88013e+06	3.99424	0.000861246	up
Q05519	Serine/arginine-rich splicing factor 11	SRSF11	1	2	1	1	1	1	272460	391900	302200	198720	163130	147350	322187	169733	1.89819	0.0173793	up
Q8WXF0	Serine/arginine-rich splicing factor 12;Serine/arginine-rich splicing factor 10	SRSF12;SRSF10	1	1	1	0	0	0	151340	94177	109360	0	0	0				0.00228904	up
Q01130	Serine/arginine-rich splicing factor 2	SRSF2	2	2	3	2	1	1	1284700	1213100	1293200	904130	419930	488910	1.26367e+06	604323	2.09104	0.0126465	up
P84103	Serine/arginine-rich splicing factor 3	SRSF3	3	3	3	2	2	2	7307900	6760500	8242100	3058800	3201800	3303900	7.43683e+06	3.18817e+06	2.33264	0.000634097	up
Q16629	Serine/arginine-rich splicing factor 7	SRSF7	3	2	2	1	2	2	5086100	3466000	3262900	587550	609470	978210	3.93833e+06	725077	5.43161	0.00554146	up
P62136	Serine/threonine-protein phosphatase PP1-alpha catalytic subunit	PPP1CA	1	0	1	1	0	0	2102700	1416100	1385000	894400	895180	455300	1634600	748293	2.18444	0.0326449	up
P62140	Serine/threonine-protein phosphatase PP1-beta catalytic subunit	PPP1CB	3	2	1	0	0	0	289790	170230	84933	0	0	0				0.0377516	up
Q04837	Single-stranded DNA-binding protein, mitochondrial	SSBP1	1	1	1	0	1	0	497380	541570	445610	0	275880	0	494853	275880	1.79373	0.0137552	up
P62316	Small nuclear ribonucleoprotein Sm D2	SNRPD2	2	3	3	1	2	1	2436200	2830100	2461900	712370	858050	743550	2.57607e+06	771323	3.3398	0.000179582	up
P62318	Small nuclear ribonucleoprotein Sm D3	SNRPD3	2	2	3	2	2	2	5016200	2951300	3372100	1618700	1459300	1417900	3.77987e+06	1.49863e+06	2.52221	0.0226753	up
Q13126	S-methyl-5-thioadenosine phosphorylase	MTAP	1	1	1	1	1	1	248530	276560	312510	187440	171580	178530	279200	179183	1.55818	0.00632818	up
P05026	Sodium/potassium-transporting ATPase subunit beta-1	ATP1B1	7	11	8	7	9	8	12847000	10742000	8701300	6547900	7485800	6537500	1.07634e+07	6.85707e+06	1.56968	0.0342864	up
Q8IVN8	Somatomedin-B and thrombospondin type-1 domain-containing protein	SBSPON	2	2	1	4	4	4	511120	316110	148090	1378800	1172800	1506800	325107	1352800	0.240321	0.00198942	down
Q00796	Sorbitol dehydrogenase	SORD	5	2	4	1	1	2	1102500	616940	843870	62362	200730	419780	854437	227624	3.75372	0.022982	up
P30626	Sorcin	SRI	1	0	0	2	2	2	329460	0	0	529270	538730	507280	329460	525093	0.627431	0.0196407	down
Q15393	Splicing factor 3B subunit 3	SF3B3	6	4	4	1	3	1	535250	344520	323710	45955	130740	44490	401160	73728.3	5.44106	0.0109973	up
O95630	STAM-binding protein	STAMBP	1	1	1	0	0	0	80368	51942	44826	0	0	0				0.00554949	up
O00391	Sulfhydryl oxidase 1	QSOX1	6	4	4	2	1	1	523700	257990	409190	147360	0	101400	396960	124380	3.19151	0.0237517	up
Q9UBT2	SUMO-activating enzyme subunit 2	UBA2	1	2	2	0	0	0	81318	123700	74240	0	0	0				0.00381727	up
P00441	Superoxide dismutase [Cu-Zn]	SOD1	3	2	3	0	1	1	1755400	1582800	1460100	0	618670	661380	1.59943e+06	640025	2.49902	0.00701201	up
Q9H190	Syntenin-2	SDCBP2	3	3	5	7	6	7	6111500	2962400	6649200	12660000	11970000	10466000	5.24103e+06	1.16987e+07	0.448003	0.00808364	down
O14907	Tax1-binding protein 3	TAX1BP3	1	1	1	0	0	0	461350	454200	384040	0	0	0				6.17158e-05	up
O60637	Tetraspanin-3	TSPAN3	1	1	1	1	1	1	1824300	1286300	1444200	884770	918690	873600	1.51827e+06	892353	1.70142	0.0174498	up
O43657	Tetraspanin-6	TSPAN6	2	2	2	0	1	1	2225000	2029900	1726200	0	637470	393090	1993700	515280	3.86916	0.00218962	up
P19075	Tetraspanin-8	TSPAN8	6	5	7	4	5	3	20899000	14061000	17019000	9142800	1842200	10628000	1.73263e+07	7.20433e+06	2.40499	0.039466	up
P07996	Thrombospondin-1	THBS1	1	1	1	3	2	3	89469	82321	87670	613790	716390	911520	86486.7	747233	0.115743	0.00163687	down
P62328	Thymosin beta-4;Hematopoietic system regulatory peptide	TMSB4X	0	0	0	1	1	1	0	0	0	2220100	2773000	2825200				0.000176151	down
Q9Y2W1	Thyroid hormone receptor-associated protein 3	THRAP3	2	2	1	0	0	0	53166	74248	53752	0	0	0				0.000956049	up
O14657	Torsin-1B	TOR1B	1	0	1	2	1	2	72730	0	0	169420	82247	140540	72730	130736	0.556313	0.0392379	down
P37837	Transaldolase	TALDO1	6	6	6	4	5	4	2084600	1575700	1551500	978240	960060	880210	1.73727e+06	939503	1.84913	0.0106373	up
Q13263	Transcription intermediary factor 1-beta	TRIM28	2	2	2	1	1	1	253700	269700	257810	50784	76849	68874	260403	65502.3	3.97548	2.78772e-05	up
P37802	Transgelin-2	TAGLN2	9	8	7	8	5	8	5555700	4568100	4352200	3493600	2237400	3448200	4.82533e+06	3.05973e+06	1.57704	0.0332383	up
P55072	Transitional endoplasmic reticulum ATPase	VCP	26	32	27	26	24	25	7725500	7907900	6657600	4475800	3870800	4104700	7.43033e+06	4.15043e+06	1.79025	0.00155683	up
P29401	Transketolase	TKT	9	12	8	5	6	4	2294600	2160800	1951300	888690	1124000	749420	2.13557e+06	920703	2.31949	0.00120294	up
Q99805	Transmembrane 9 superfamily member 2	TM9SF2	3	3	3	0	2	1	851020	638570	503430	0	196630	180830	664340	188730	3.52006	0.0106817	up
Q9HD45	Transmembrane 9 superfamily member 3	TM9SF3	2	1	1	0	0	0	305870	347180	298940	0	0	0				2.99736e-05	up
Q13428	Treacle protein	TCOF1	1	1	1	1	1	1	32978	39877	36732	12459	20176	13492	36529	15375.7	2.37577	0.00251405	up
P22102	Trifunctional purine biosynthetic protein adenosine-3;Phosphoribosylamine--glycine ligase;Phosphoribosylformylglycinamidine cyclo-ligase;Phosphoribosylglycinamide formyltransferase	GART	4	1	2	0	1	0	156930	52612	91380	0	26816	0	100307	26816	3.74058	0.0450253	up
P68366	Tubulin alpha-4A chain	TUBA4A	2	1	2	3	2	3	397500	282640	462650	800030	596550	819840	380930	738807	0.515602	0.0156501	down
P68371	Tubulin beta-4B chain;Tubulin beta-4A chain	TUBB4B;TUBB4A	4	4	4	4	4	4	20746000	17672000	16222000	12763000	11023000	9960500	1.82133e+07	1.12488e+07	1.61913	0.0112204	up
Q9GZM7	Tubulointerstitial nephritis antigen-like	TINAGL1	6	6	7	9	11	10	3260600	2362700	2014000	4717800	5945100	6803300	2.54577e+06	5.82207e+06	0.437262	0.00992217	down
O43399	Tumor protein D54	TPD52L2	1	2	1	0	0	0	83527	195380	75186	0	0	0				0.038177	up
P54577	Tyrosine--tRNA ligase, cytoplasmic;Tyrosine--tRNA ligase, cytoplasmic, N-terminally processed	YARS	2	3	4	0	1	1	90813	175400	221670	0	51913	52385	162628	52149	3.11852	0.0384316	up
P08621	U1 small nuclear ribonucleoprotein 70 kDa	SNRNP70	2	3	2	0	0	0	287340	366250	178800	0	0	0				0.00695184	up
O75643	U5 small nuclear ribonucleoprotein 200 kDa helicase	SNRNP200	3	2	3	1	1	1	35004	25016	38570	15597	12265	16418	32863.3	14760	2.22651	0.0130635	up
P45974	Ubiquitin carboxyl-terminal hydrolase 5	USP5	3	3	4	1	1	2	137350	159790	129540	32800	29768	70887	142227	44485	3.19718	0.00366681	up
P22314	Ubiquitin-like modifier-activating enzyme 1	UBA1	14	12	14	6	8	7	1875200	1566100	1630400	251620	361120	368780	1.69057e+06	327173	5.16719	0.000177571	up
O60701	UDP-glucose 6-dehydrogenase	UGDH	12	8	8	8	8	7	2136700	1650500	1483300	1017700	951110	964820	1.75683e+06	977877	1.79658	0.0167657	up
Q9UM54	Unconventional myosin-VI	MYO6	4	4	4	0	1	1	155320	189750	176990	0	43229	40295	174020	41762	4.16695	0.00104881	up
Q03405	Urokinase plasminogen activator surface receptor	PLAUR	3	1	0	2	3	3	291880	99133	0	324270	517400	523140	195506	454937	0.429744	0.0394728	down
Q96QK1	Vacuolar protein sorting-associated protein 35	VPS35	2	2	2	0	0	0	110490	90324	80390	0	0	0				0.000450688	up
P26640	Valine--tRNA ligase	VARS	2	4	3	0	1	1	74421	167780	89268	0	19533	40290	110490	29911.5	3.69389	0.0440727	up
P45880	Voltage-dependent anion-selective channel protein 2	VDAC2	2	3	3	1	1	1	378580	384160	489870	133080	123360	134760	417537	130400	3.20197	0.0013931	up
Q9Y4E6	WD repeat-containing protein 7	WDR7	1	1	1	1	1	1	824360	919320	709880	497040	499850	605450	817853	534113	1.53124	0.0156371	up
P12956	X-ray repair cross-complementing protein 6	XRCC6	8	7	5	1	2	2	695590	758750	534980	37272	176920	137740	663107	117311	5.65257	0.00225095	up
Q7Z2W4	Zinc finger CCCH-type antiviral protein 1	ZC3HAV1	1	1	1	1	1	1	40399	38961	41064	23845	23300	26652	40141.3	24599	1.63183	0.000211637	up
